# Supplementary material for: Proteomic analysis of HEK293 cells expressing non small cell lung carcinoma associated epidermal growth factor receptor variants reveals induction of heat shock response
Source: Springer Nature journal article supplement (doi:10.1186/s40164-015-0010-5), 2015-06-11
Supplement: MOESM2 [file 9788576]

**Additional file 2: Mutational sequences of exons encoding EGFR tyrosine kinase domain.**

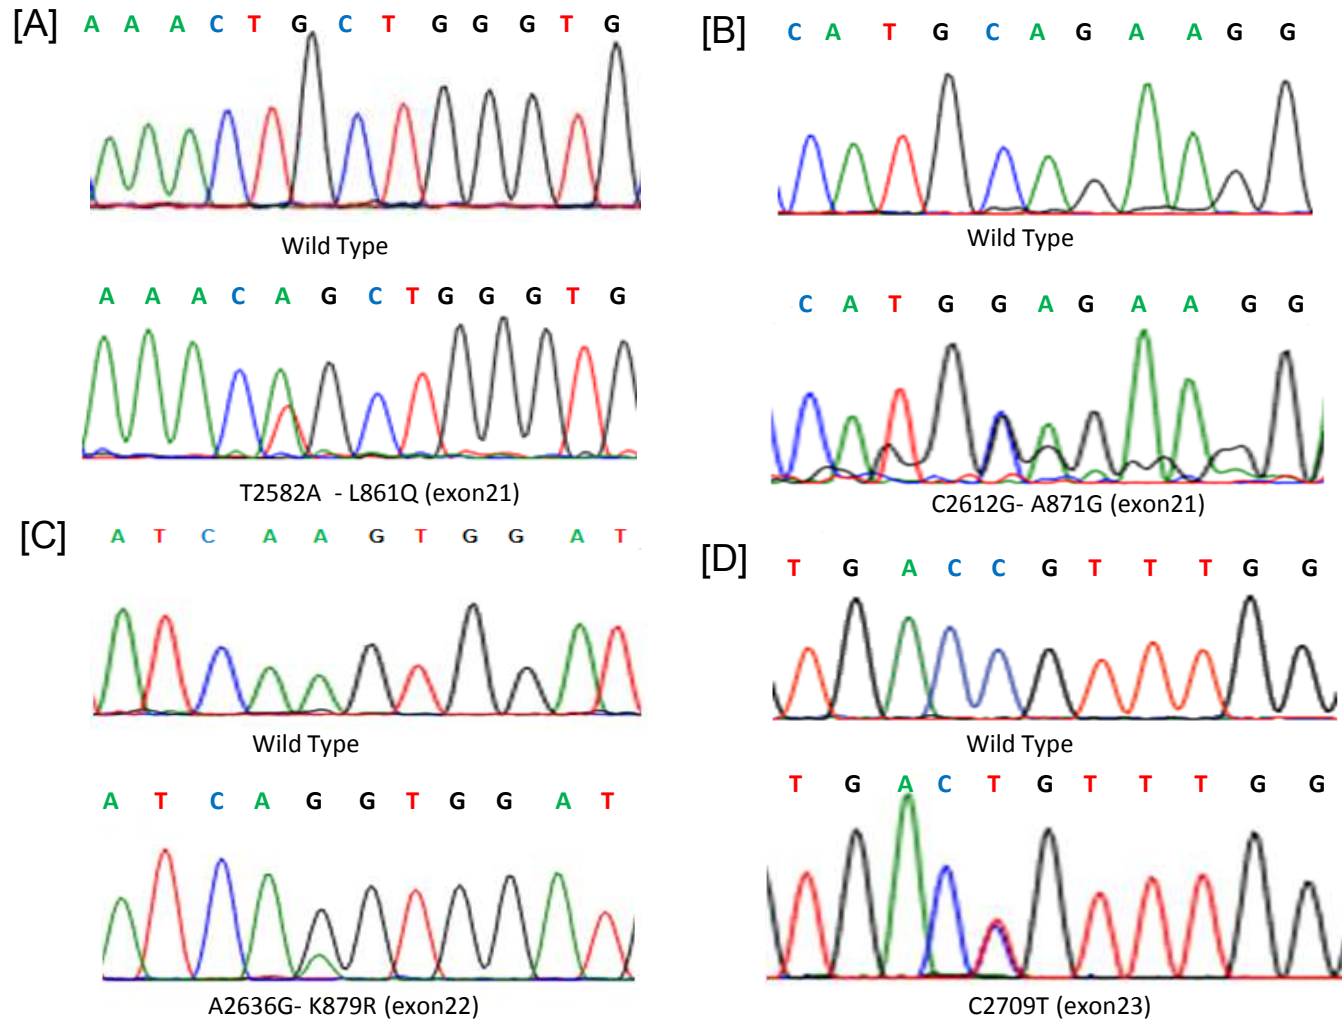

A and B. Base changes indicated as double peaks at positions 2582 (T to A), 2612 (C to G) in exon21. C. Base change at position 2636 (A to G) in exon22 . D. The change at position 2709 (C to T) in exon23 .
