# Supplementary material for: Proteomic analysis of HEK293 cells expressing non small cell lung carcinoma associated epidermal growth factor receptor variants reveals induction of heat shock response
Source: Springer Nature journal article supplement (doi:10.1186/s40164-015-0010-5), 2015-06-11
Supplement: MOESM5 [file 9788576]

**Additional file 5: Effect of Erlotinib on HEK 293 expressing wild type and mutants, L861Q and A871G**

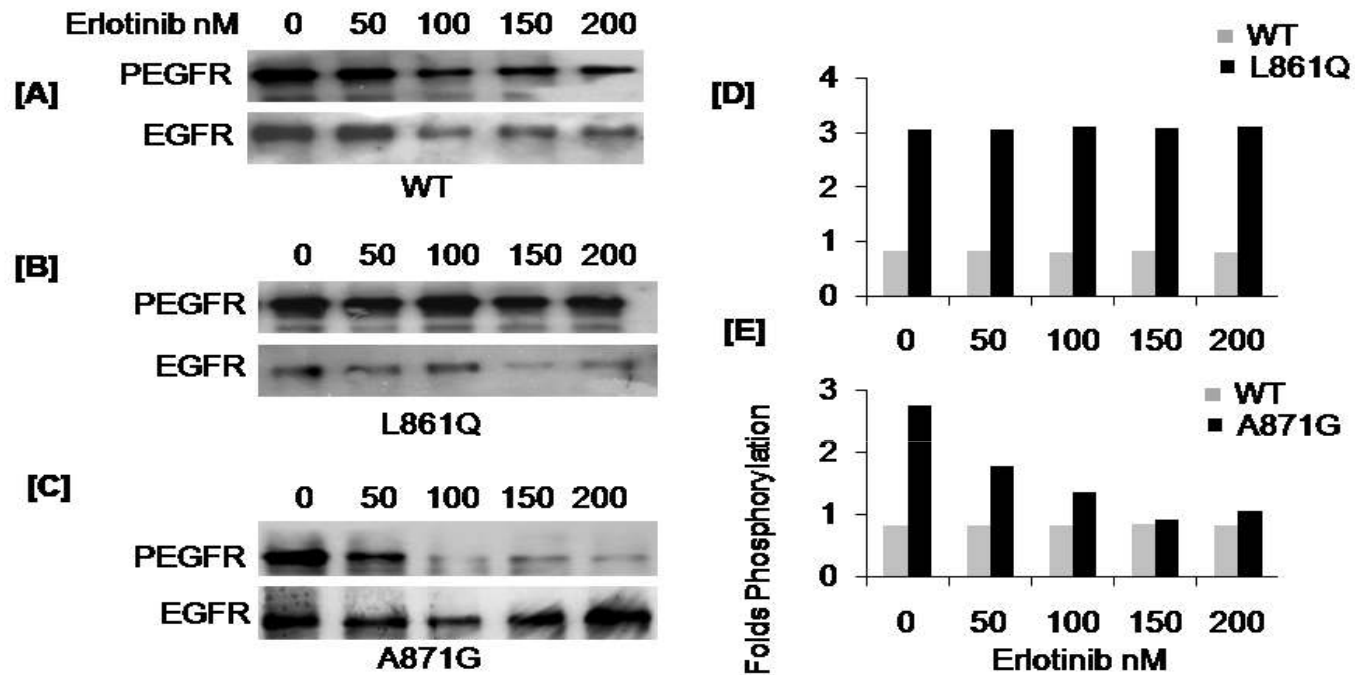

Experiment was done as described in the above figure, but cells were treated with different concentrations of Erlotinib (TKI). A. Phospho and total EGFR levels of wild type receptor. B & C. Phospho and total EGFR levels of each mutant L861Q and A871G respectively. D & E. Densitometry values of signal intensity of each mutant vs. wild type receptor
