# Supplementary material for: Proteomic analysis of HEK293 cells expressing non small cell lung carcinoma associated epidermal growth factor receptor variants reveals induction of heat shock response
Source: Springer Nature journal article supplement (doi:10.1186/s40164-015-0010-5), 2015-06-11
Supplement: MOESM7 [file 9788576]

**Additional file 7: Different densities of analyzed protein spots of wild vs. all three mutants resolved on 2D gels.**

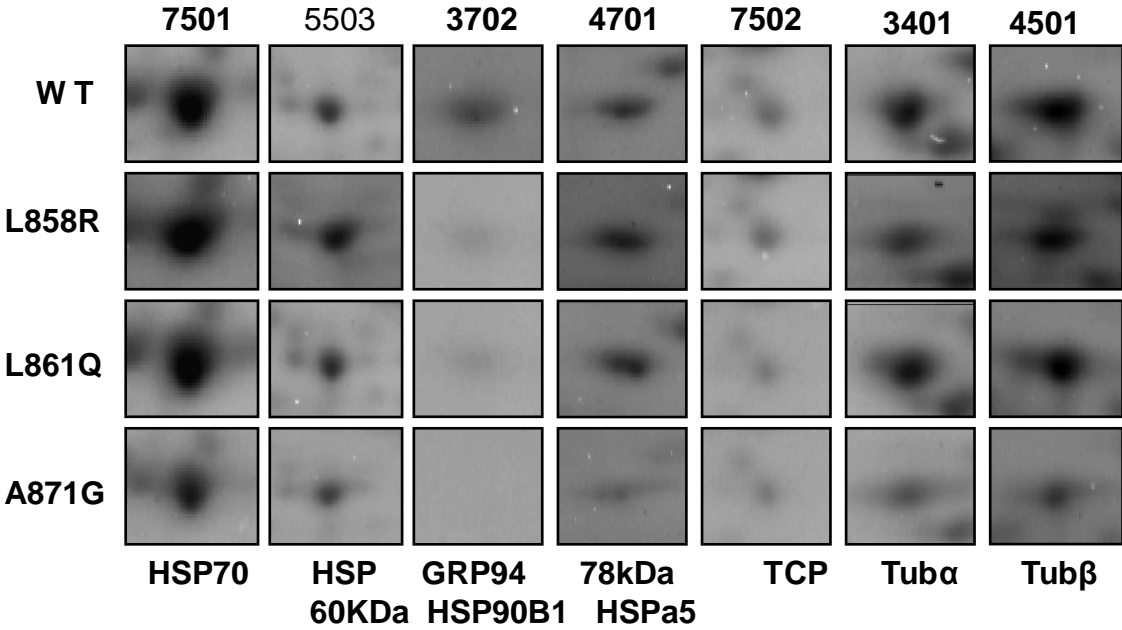

Proteins identified by MS analysis, corresponding protein name and density observed in each mutant vs. wild type receptor expressing cell lysates
