# Supplementary material for: Proteomic analysis of HEK293 cells expressing non small cell lung carcinoma associated epidermal growth factor receptor variants reveals induction of heat shock response
Source: Springer Nature journal article supplement (doi:10.1186/s40164-015-0010-5), 2015-06-11
Supplement: MOESM8 [file 9788576]

**Additional file 8: Identification of proteins differentially abundant HEK293 cells expressing L861Q mutant vs. wild type by MALDI-TOF/MS analysis (IEF carried out with 3-10pH range IPG strips)**

| Spot | Protein name                                                                 | Accession No | Molecular Weight | PI   | Mascot Score | Folds change LQ vs. WT |
|------|------------------------------------------------------------------------------|--------------|------------------|------|--------------|------------------------|
| 1    | Fibrinogen gamma                                                             | gi 70906437  | 50092            | 5.54 | 34           | 1.95                   |
| 2    | Coiled-coil domain-containing protein 54                                     | gi 14211937  | 37857.69         | 8.46 | 25           | Undetectable in WT     |
| 3    | Transcription factor HOXD11                                                  | gi 8777659   | 35500.67         | 9.43 | 29           | - do-                  |
| 4    | Homeobox protein Hox-B4                                                      | gi 13273315  | 27604.35         | 9.82 | 24           | -do-                   |
| 4    | SRRM2 protein                                                                | gi 116283923 | 22229.14         | 9.37 | 24           | -do-                   |
| 5    | DEAD (Asp-Glu-Ala-Asp) box polypeptide 6, isoform CRA_a                      | gi 119587816 | 36194.04         | 8.14 | 25           | -do-                   |
| 6    | Chain A, Crystal Structure Of Human Glycine N-Methyltransferase              | gi 55669632  | 32611.07         | 6.58 | 20           | - do-                  |
| 7    | IFIT2                                                                        | gi 116283326 | 48070.11         | 8.41 | 36           | 2.11                   |
| 8    | dystrobrevin-gamma                                                           | gi 1255993   | 58898.43         | 8.47 | 30           | 2.2                    |
| 9    | Heat shock 70 kDa protein 1A/1B                                              | gi 167466173 | 70052.23         | 5.47 | 31           | 1.95                   |
| 10   | WD repeat-containing and planar cell polarity effector protein fritz homolog | gi 111548652 | 85083.71         | 5.96 | 28           | 2.11                   |
