# Supplementary material for: Proteomic analysis of HEK293 cells expressing non small cell lung carcinoma associated epidermal growth factor receptor variants reveals induction of heat shock response
Source: Springer Nature journal article supplement (doi:10.1186/s40164-015-0010-5), 2015-06-11
Supplement: MOESM9 [file 9788576]

**Additional file 9: Gene specific primer sequences used for real time PCR amplification**

| S. No. | Gene name                                                                         | Primer sequence                                             |
|--------|-----------------------------------------------------------------------------------|-------------------------------------------------------------|
| 1      | Homo sapiens heat shock 70kDa protein 1B (HSPA1B)                                 | FP-CCACCAAGCAGACGCAGAT<br>RP-GCCCTCGTACACCTGGATCA           |
| 2      | Homo sapiens fibrinogen gamma chain (FGG)                                         | FP-TGGATCTGGTTGGTGGATGA<br>RP-TTTTGAGTAAGTGCCACCTTGGT       |
| 3      | Homo sapiens interferon- induced protein with tetratricopeptide repeats 2 (IFIT2) | FP-AAAGCTGATGAGGCCAATGATAA<br>RP-GCATGGAGGCTGGCAAGA         |
| 4      | Homo sapiens homeobox D11 (HOXD11)                                                | FP-CTTCGCTAGCAAGCCTTCGT<br>RP- CGGAGCCAGGTTGGAAGAG          |
| 5      | Homo sapiens DEAD box helicase 6 (DDX6), transcript variant 1, mRNA               | FP-AGCAACAGATGAACCAGCTGAAA<br>RP-AATAGTGGTGGTCATACTCTGTGCTT |
| 6      | Homo sapiens tubulin, $\beta$ 2C(TUBB2C), mRNA                                    | FP-GGAGTACCCAGACAGGATCATGA<br>RP-TGTAGGGCTCCACCACTGTGT      |
| 7      | Homo sapiens tubulin, $\alpha$ 1b (TUBA1B), mRNA                                  | FP-TGACCTTGTGTTGGACCGAAT<br>RP-GAAAACCAAGAAGCCCTGAAGAC      |
| 8      | Homo sapiens chaperonin containing TCP1, subunit 5 (epsilon) (CCT5),              | FP-GGCTGCTCGTGTTGCTATTG<br>RP-GGGTTCGGTGTCTTTATGTCA         |
| 9      | Homo sapiens heat shock 70kDa protein (HSPA5)                                     | FP-TGCGTCGGCGTGTTCA<br>RP-CGACATAGGACGGCGTGAT               |
| 10     | Homo sapiens heat shock protein 90kDa beta (Grp94), member 1 (HSP90B1)            | FP-CCGCCTTCCTTGTAGCAGAT<br>RP-CCTCTTGGGTCAGCAATTACAGA       |
| 11     | Homo sapiens glyceraldehyde-3-phosphate dehydrogenase                             | FP-TGCACCACCAACTGCTTAGC<br>RP-GGCATGGACTGTGGTCATGAG         |
